# Supplementary material for: A proteomic analysis shows the stimulation of light reactions and inhibition of the Calvin cycle in the skin chloroplasts of ripe red grape berries
Source: PubMed Central journal article supplement (PMC9641181; doi:10.3389/fpls.2022.1014532), 2022-10-25
Supplement: Image_1.pdf [file Image_1.pdf]

## A proteomic analysis shows stimulation of light reactions and inhibition of Calvin cycle in skin chloroplasts of ripe red grape berries

António Teixeira <sup>a\*</sup>, Henrique Noronha <sup>a\*</sup>, Mónica Sebastiana <sup>b</sup>, Ana Margarida Fortes <sup>b</sup>,  
Hernâni Gerós <sup>a</sup>

<sup>a</sup> Centre of Molecular and Environmental Biology (CBMA), Department of Biology, 2  
University of Minho, Braga 4710-057, Portugal

<sup>b</sup> BioISI – Instituto de Biosistemas e Ciências Integrativas, Faculdade de Ciências,  
Universidade de Lisboa, 1749-016 Lisboa, Portugal

\*Corresponding authors: [antonio.teixeira@bio.uminho.pt](mailto:antonio.teixeira@bio.uminho.pt); [henriquenoronha@bio.uminho.pt](mailto:henriquenoronha@bio.uminho.pt)

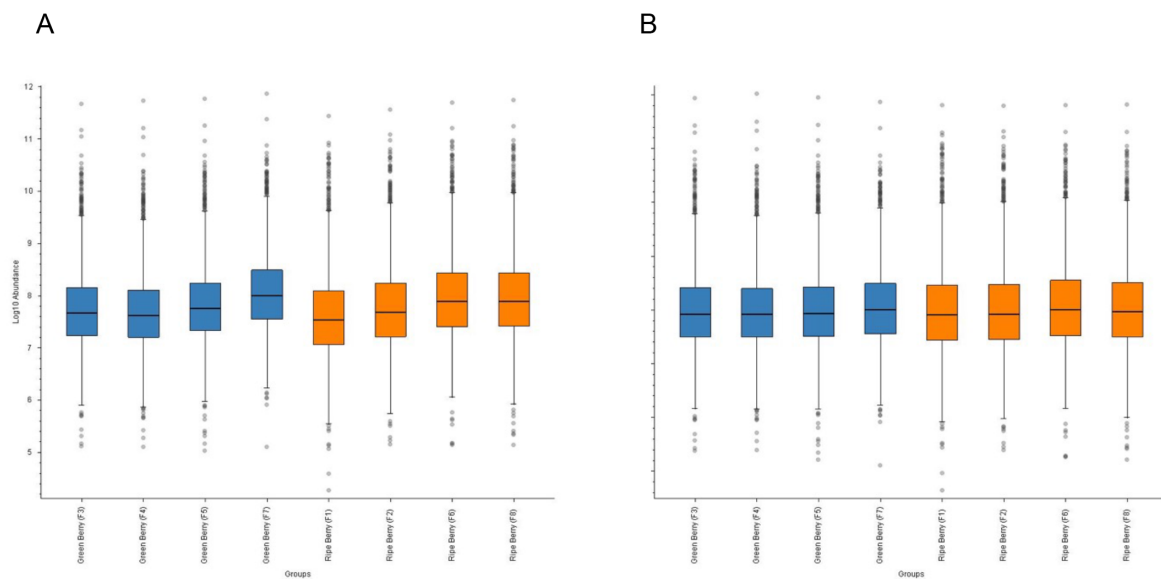

**Figure S1.** Total identified proteins from purified plastids from exocarp of *Vitis vinifera* cv 'Vinhão' at mature stage (E-L 38) versus green stage (E-L 34). (A) Abundance before normalization (B) Abundance after normalization.

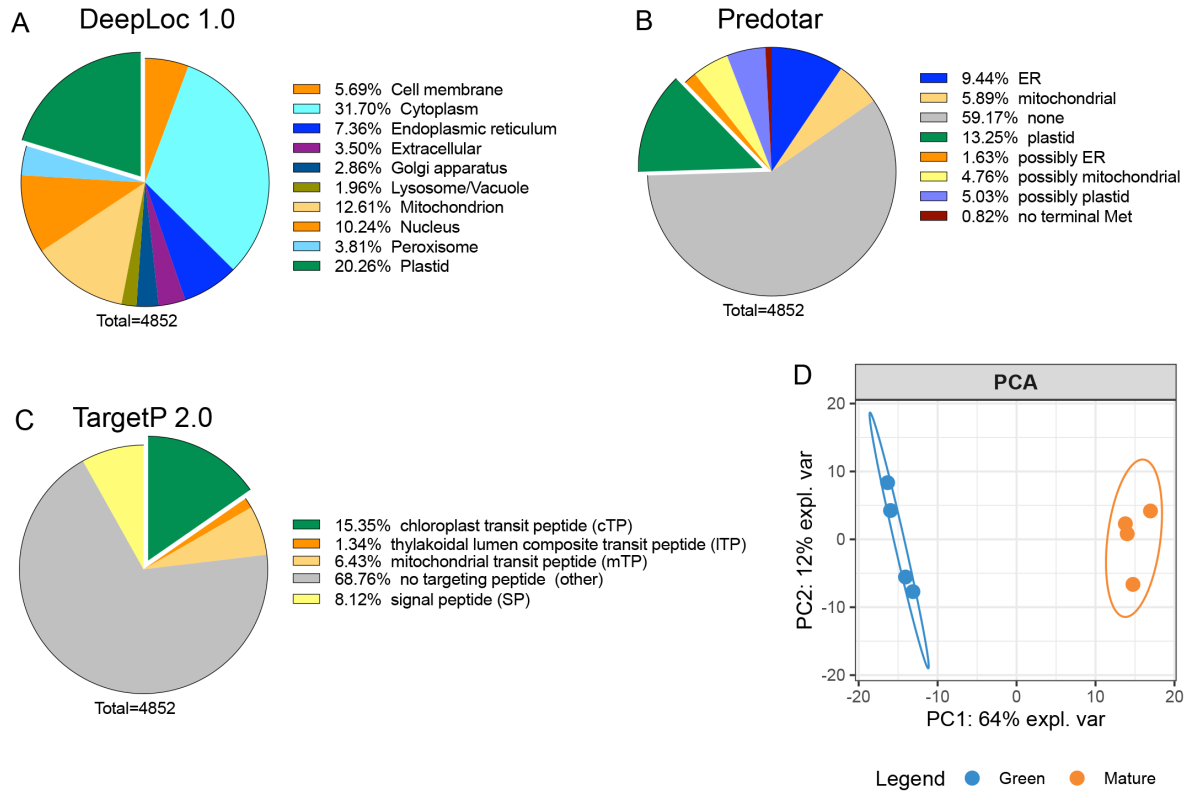

**Figure S2.** Protein subcellular localization prediction of total identified proteins from purified plastids of exocarp of *Vitis vinifera* cv ‘Vinhão’ at mature stage (E-L 38) versus green stage (E-L 34) by (A) DeepLoc 1.0, (B) Predotar and (C) TargetP 2.0. (D) Principal Component Analysis of proteins targeted to plastid.
